# Supplementary material
Source: Springer Nature journal article supplement (https://www.springermedizin.de/resource/supplementary/12885_2014_4810_MOESM7_ESM.pdf/9467350)

**A**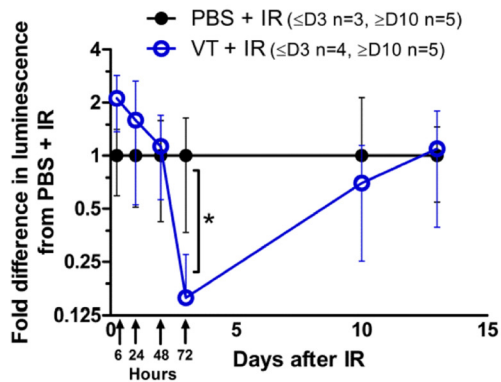**B**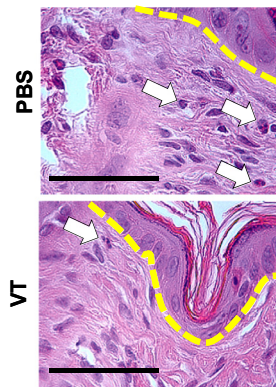

Mean neutrophils/HPF

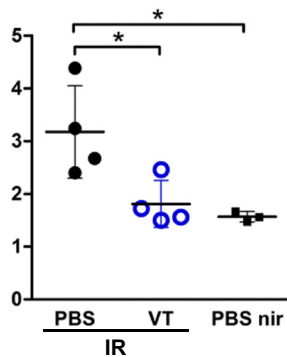**C**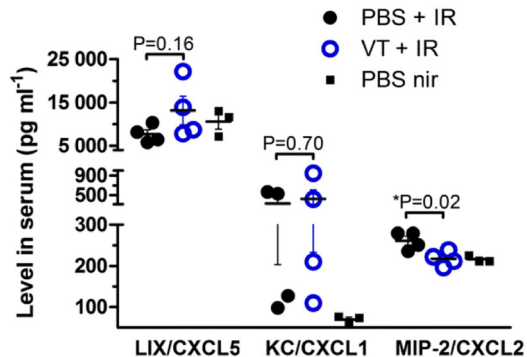**D**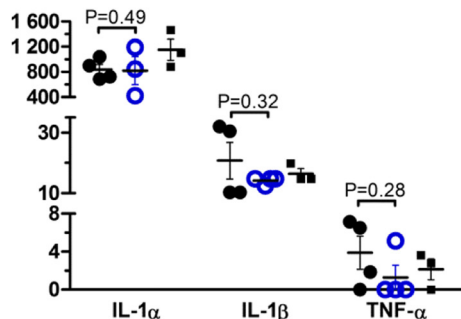**E**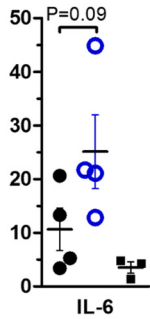

Supplement: MOESM7 [file 9467350]
